# Supplementary material
Source: Elsevier journal article supplement (https://comptes-rendus.academie-sciences.fr/geoscience/article/10.1016/j.crte.2011.11.004/file/attach/mmc1.pdf)
Supplement: mmc1 [file mmc1.pdf]

Table. Result of finite-strain analysis by MRL method (Mulchrone et al., 2003) on meta-sandstones from the Uzunakhmat sheet

| Sample | Domain | $R_{xy}$ | $R_{xz}$ | $\epsilon_x$ | $\epsilon_y$ | $\epsilon_z$ | $E_d$ | $\nu$ | <i>X</i> -axis orientation |     | <i>Y</i> -axis orientation |     | <i>Z</i> -axis orientation |    |
|--------|--------|----------|----------|--------------|--------------|--------------|-------|-------|----------------------------|-----|----------------------------|-----|----------------------------|----|
| N12    |        | 1.06     | 1.07     | 0.03         | 0.02         | -            | 0.05  | 0.72  | 2                          | 80  | 236                        | 14  | 142                        | 18 |
|        |        |          |          |              |              | 0.04         |       |       |                            |     |                            |     |                            |    |
| N11    |        | 1.31     | 1.28     | 0.1          | 0.07         | -            | 0.21  | 0.83  | 92                         | 1   | 357                        | 66  | 182                        | 12 |
|        |        |          |          |              |              | 0.17         |       |       |                            |     |                            |     |                            |    |
| N10    |        | 1.1      | 1.28     | 0.13         | -            | -            | 0.18  | -     | 355                        | 70  | 110                        | 3   | 200                        | 7  |
|        |        |          |          |              | 0.02         | 0.11         |       | 0.23  |                            |     |                            |     |                            |    |
| N9     |        | 1.21     | 1.11     | 0.09         | 0.01         | -            | 0.13  | 0.09  | 83                         | 1   | 350                        | 76  | 173                        | 17 |
|        |        |          |          |              |              | 0.1          |       |       |                            |     |                            |     |                            |    |
| N8     |        | 1.29     | 1.11     | 0.13         | -            | -            | 0.18  | -     | 254                        | 5   | 350                        | 43  | 159                        | 40 |
|        |        |          |          |              | 0.02         | 0.12         |       | 0.18  |                            |     |                            |     |                            |    |
| N7     |        | 1.27     | 1.15     | 0.11         | 0.01         | -            | 0.17  | 0.17  | 67                         | 12  | 331                        | 22  | 182                        | 63 |
|        |        |          |          |              |              | 0.13         |       |       |                            |     |                            |     |                            |    |
| N6     |        | 1.18     | 1.23     | 0.08         | 0.04         | -            | 0.15  | 0.6   | 327                        | 33  | 63                         | 8   | 165                        | 55 |
|        |        |          |          |              |              | 0.12         |       |       |                            |     |                            |     |                            |    |
| N5     |        | 1.26     | 1.19     | 0.1          | 0.04         | -            | 0.17  | 0.51  | 93                         | 14  | 351                        | 46  | 199                        | 47 |
|        |        |          |          |              |              | 0.14         |       |       |                            |     |                            |     |                            |    |
| N4     |        | 1.21     | 1.28     | 0.1          | 0.04         | -            | 0.18  | 0.54  | 331                        | 12  | 64                         | 7   | 169                        | 64 |
|        |        |          |          |              |              | 0.15         |       |       |                            |     |                            |     |                            |    |
| N3     |        | 1.12     | 1.36     | 0.17         | -            | -            | 0.22  | -     | 1                          | 62  | 104                        | 6   | 196                        | 22 |
|        |        |          |          |              | 0.03         | 0.14         |       | 0.26  |                            |     |                            |     |                            |    |
| N2     |        | 1.2      | 1.16     | 0.07         | 0.04         | -            | 0.14  | 0.63  | 70                         | 14  | 335                        | 51  | 192                        | 65 |
|        |        |          |          |              |              | 0.11         |       |       |                            |     |                            |     |                            |    |
| N1     |        | 1.22     | 1.09     | 0.1          | -            | -            | 0.14  | -     | 172                        | 5   | 265                        | 63  | 73                         | 30 |
|        |        |          |          |              | 0.01         | 0.1          |       | 0.13  |                            |     |                            |     |                            |    |
| Z1     | A east | 1.12     | 1.25     | 0.11         | 0            | -            | 0.16  | 0.02  | 343                        | 83  | 41                         | 2   | 131                        | 3  |
|        |        |          |          |              |              | 0.11         |       |       |                            |     |                            |     |                            |    |
| Z2     |        | 1.42     | 1.76     | 0.26         | 0.05         | -            | 0.4   | 0.24  | 355                        | 54  | 256                        | 5   | 163                        | 29 |
|        |        |          |          |              |              | 0.31         |       |       |                            |     |                            |     |                            |    |
| Z3     |        | 1.61     | 1.78     | 0.23         | 0.13         | -            | 0.44  | 0.65  | 17                         | 44  | 286                        | 1   | 194                        | 54 |
|        |        |          |          |              |              | 0.35         |       |       |                            |     |                            |     |                            |    |
| O1-1   |        | 1.44     | 1.39     | 0.13         | 0.1          | -            | 0.28  | 0.81  | 265                        | 4   | 3                          | 60  | 173                        | 29 |
|        |        |          |          |              |              | 0.23         |       |       |                            |     |                            |     |                            |    |
| O1-2   |        | 1.44     | 1.27     | 0.16         | 0.04         | -            | 0.26  | 0.31  | 87                         | 6   | 343                        | 62  | 180                        | 22 |
|        |        |          |          |              |              | 0.2          |       |       |                            |     |                            |     |                            |    |
| O1-3   | 1.15   | 1.19     | 0.07     | 0.04         | -            | 0.13         | 0.61  | 335   | 68                         | 219 | 3                          | 129 | 6                          |    |
|        |        |          |          |              | 0.1          |              |       |       |                            |     |                            |     |                            |    |
| O2     | 1.37   | 1.26     | 0.13     | 0.05         | -            | 0.23         | 0.47  | 76    | 4                          | 339 | 55                         | 169 | 29                         |    |
|        |        |          |          |              | 0.18         |              |       |       |                            |     |                            |     |                            |    |
| O3     | 1.28   | 1.34     | 0.11     | 0.07         | -            | 0.22         | 0.69  | 343   | 48                         | 252 | 0                          | 162 | 25                         |    |
|        |        |          |          |              | 0.18         |              |       |       |                            |     |                            |     |                            |    |
| O4     | 1.22   | 1.29     | 0.1      | 0.05         | -            | 0.19         | 0.56  | 183   | 61                         | 286 | 3                          | 17  | 14                         |    |
|        |        |          |          |              | 0.15         |              |       |       |                            |     |                            |     |                            |    |
| O5     | 1.08   | 1.16     | 0.07     | 0            | -            | 0.1          | 0.04  | 357   | 68                         | 240 | 1                          | 150 | 2                          |    |
|        |        |          |          |              | 0.08         |              |       |       |                            |     |                            |     |                            |    |
| O6     | 1.26   | 1.16     | 0.1      | 0.02         | -            | 0.17         | 0.28  | 355   | 63                         | 254 | 9                          | 156 | 39                         |    |
|        |        |          |          |              | 0.13         |              |       |       |                            |     |                            |     |                            |    |
| O7-1   | 1.19   | 1.25     | 0.09     | 0.04         | -            | 0.17         | 0.56  | 353   | 81                         | 113 | 11                         | 206 | 18                         |    |
|        |        |          |          |              | 0.13         |              |       |       |                            |     |                            |     |                            |    |
| O7-2   | 1.37   | 1.46     | 0.15     | 0.08         | -            | 0.29         | 0.66  | 47    | 78                         | 140 | 0                          | 230 | 4                          |    |
|        |        |          |          |              | 0.23         |              |       |       |                            |     |                            |     |                            |    |
| O8     | 1.19   | 1.36     | 0.15     | 0.01         | -            | 0.22         | 0.13  | 359   | 66                         | 268 | 1                          | 177 | 30                         |    |
|        |        |          |          |              | 0.16         |              |       |       |                            |     |                            |     |                            |    |

| Sample | Domain | $R_{xy}$ | $R_{xz}$ | $\varepsilon_x$ | $\varepsilon_y$ | $\varepsilon_z$ | $E_d$ | $v$   | X-axis orientation | Y-axis orientation | Z-axis orientation |     |     |    |
|--------|--------|----------|----------|-----------------|-----------------|-----------------|-------|-------|--------------------|--------------------|--------------------|-----|-----|----|
| 918    | A west | 1.53     | 1.38     | 0.18            | 0.07            | -               | 0.31  | 0.51  | 239                | 5                  | 325                | 54  | 145 | 40 |
|        |        |          |          |                 |                 | 0.25            |       |       |                    |                    |                    |     |     |    |
| 920    |        | 1.52     | 1.44     | 0.16            | 0.1             | -               | 0.32  | 0.74  | 85                 | 0                  | 355                | 38  | 175 | 55 |
|        |        |          |          |                 |                 | 0.26            |       |       |                    |                    |                    |     |     |    |
| 933    |        | 1.62     | 1.38     | 0.21            | 0.05            | -               | 0.35  | 0.34  | 249                | 2                  | 340                | 27  | 156 | 65 |
|        |        |          |          |                 |                 | 0.27            |       |       |                    |                    |                    |     |     |    |
| 939    |        | 1.63     | 1.39     | 0.22            | 0.06            | -               | 0.35  | 0.35  | 285                | 10                 | 43                 | 69  | 190 | 25 |
|        |        |          |          |                 |                 | 0.27            |       |       |                    |                    |                    |     |     |    |
| 940    |        | 1.61     | 1.37     | 0.21            | 0.05            | -               | 0.34  | 0.32  | 282                | 8                  | 27                 | 62  | 189 | 24 |
|        |        |          |          |                 |                 | 0.26            |       |       |                    |                    |                    |     |     |    |
| 943    |        | 1.59     | 1.3      | 0.22            | 0.02            | -               | 0.33  | 0.13  | 97                 | 0                  | 7                  | 34  | 188 | 47 |
|        |        |          |          |                 |                 | 0.24            |       |       |                    |                    |                    |     |     |    |
| 944    |        | 1.29     | 1.13     | 0.13            | 0               | -               | 0.18  | -0.04 | 287                | 17                 | 36                 | 21  | 171 | 65 |
|        |        |          |          |                 |                 | 0.13            |       |       |                    |                    |                    |     |     |    |
| 946    |        | 1.04     | 1.06     | 0.03            | 0.03            | -               | 0.05  | 1     | 33                 | 4                  | 293                | 7   | 199 | 56 |
|        |        |          |          |                 | 0.03            |                 |       |       |                    |                    |                    |     |     |    |
| 954    | 1.07   | 1.21     | 0.1      | 0.1             | -               | 0.16            | 1     | 29    | 44                 | 284                | 6                  | 192 | 23  |    |
|        |        |          |          |                 | 0.09            |                 |       |       |                    |                    |                    |     |     |    |
| 957    | 1.17   | 1.2      | 0.07     | 0.07            | -               | 0.15            | 1     | 53    | 58                 | 144                | 2                  | 236 | 32  |    |
|        |        |          |          |                 | 0.11            |                 |       |       |                    |                    |                    |     |     |    |
| 962    | 1.74   | 1.47     | 0.24     | 0.07            | -               | 0.4             | 0.39  | 286   | 12                 | 57                 | 72                 | 190 | 25  |    |
|        |        |          |          |                 | 0.31            |                 |       |       |                    |                    |                    |     |     |    |
| 964    | 1.71   | 1.51     | 0.22     | 0.1             | -               | 0.4             | 0.54  | 276   | 13                 | 31                 | 59                 | 179 | 26  |    |
|        |        |          |          |                 | 0.32            |                 |       |       |                    |                    |                    |     |     |    |
| 12     | B      | 1.76     | 1.47     | 0.25            | 0.07            | -               | 0.41  | 0.36  | 278                | 18                 | 35                 | 54  | 179 | 25 |
|        |        |          |          |                 |                 | 0.32            |       |       |                    |                    |                    |     |     |    |
| 50     |        | 1.44     | 1.38     | 0.14            | 0.09            | -               | 0.28  | 0.77  | 248                | 3                  | 165                | 45  | 345 | 45 |
|        |        |          |          |                 |                 | 0.23            |       |       |                    |                    |                    |     |     |    |
| 52     |        | 1.24     | 1.71     | 0.29            | 0.29            | -               | 0.44  | 1     | 82                 | 3                  | 195                | 68  | 345 | 22 |
|        |        |          |          |                 |                 | 0.25            |       |       |                    |                    |                    |     |     |    |
| 54     |        | 1.43     | 1.3      | 0.15            | 0.06            | -               | 0.26  | 0.47  | 80                 | 2                  | 165                | 64  | 345 | 26 |
|        |        |          |          |                 |                 | 0.21            |       |       |                    |                    |                    |     |     |    |
| 85     |        | 1.53     | 1.29     | 0.2             | 0.03            | -               | 0.3   | 0.2   | 293                | 5                  | 26                 | 29  | 192 | 65 |
|        |        |          |          |                 |                 | 0.23            |       |       |                    |                    |                    |     |     |    |
| 925    |        | 1.21     | 1.03     | 0.12            | -0.04           | -               | 0.15  |       | 89                 | 4                  | 353                | 47  | 182 | 38 |
|        |        |          |          |                 |                 | 0.07            |       | 0.69  |                    |                    |                    |     |     |    |
| 927    |        | 1.33     | 1.27     | 0.11            | 0.06            | -               | 0.22  | 0.68  | 94                 | 1                  | 3                  | 40  | 185 | 46 |
|        |        |          |          |                 |                 | 0.17            |       |       |                    |                    |                    |     |     |    |
| 971    |        | 1.36     | 1.18     | 0.15            | 0.01            | -               | 0.22  | 0.08  | 119                | 7                  | 21                 | 21  | 216 | 42 |
|        |        |          |          |                 | 0.16            |                 |       |       |                    |                    |                    |     |     |    |
| 972    | 1.62   | 1.24     | 0.25     | -               | -               | 0.34            | -     | 302   | 1                  | 34                 | 36                 | 210 | 64  |    |
|        |        |          |          | 0.02            | 0.23            |                 | 0.11  |       |                    |                    |                    |     |     |    |
| 975    | 1.69   | 1.27     | 0.27     | -               | -               | 0.37            | -     | 292   | 1                  | 23                 | 37                 | 201 | 33  |    |
|        |        |          |          | 0.02            | 0.25            |                 | 0.09  |       |                    |                    |                    |     |     |    |
| 977    | 1.76   | 1.2      | 0.32     | -               | -               | 0.41            | -     | 305   | 10                 | 55                 | 63                 | 209 | 28  |    |
|        |        |          |          | 0.07            | 0.25            |                 | 0.35  |       |                    |                    |                    |     |     |    |
| 978    | 1.86   | 1.25     | 0.34     | -               | -               | 0.44            | -     | 285   | 25                 | 22                 | 14                 | 150 | 57  |    |
|        |        |          |          | 0.06            | 0.28            |                 | 0.28  |       |                    |                    |                    |     |     |    |

| Sample | Domain  | $R_{xy}$ | $R_{xz}$ | $\varepsilon_x$ | $\varepsilon_y$ | $\varepsilon_z$ | $E_d$ | $\nu$ | X-axis orientation |     | Y-axis orientation |     | Z-axis orientation |     |    |
|--------|---------|----------|----------|-----------------|-----------------|-----------------|-------|-------|--------------------|-----|--------------------|-----|--------------------|-----|----|
| 2      | C       | 1.69     | 1.13     | 0.31            | 0.09            | 0.22            | 0.39  | -     | 103                | 0   | 12                 | 27  | 192                | 50  |    |
| 5      |         | 1.85     | 1.26     | 0.33            | 0.05            | 0.28            | 0.44  | -     | 278                | 5   | 185                | 23  | 13                 | 48  |    |
| 9      |         | 1.87     | 1.27     | 0.34            | 0.05            | 0.29            | 0.45  | -     | 132                | 6   | 41                 | 11  | 282                | 81  |    |
| 11     |         | 1.59     | 1.15     | 0.26            | 0.06            | 0.2             | 0.34  | -     | 262                | 14  | 159                | 42  | 5                  | 45  |    |
| 44     |         | 1.7      | 1.35     | 0.25            | 0.02            | 0.28            | 0.38  | -     | 260                | 15  | 10                 | 52  | 157                | 38  |    |
| 45     |         | 1.43     | 1.17     | 0.19            | 0.01            | 0.17            | 0.25  | -     | 269                | 2   | 5                  | 40  | 185                | 50  |    |
| 46     |         | 1.62     | 1.23     | 0.25            | 0.02            | 0.23            | 0.34  | -     | 92                 | 4   | 355                | 60  | 184                | 30  |    |
| 47     |         | 2.02     | 1.27     | 0.39            | 0.08            | 0.31            | 0.51  | -     | 259                | 20  | 150                | 43  | 4                  | 34  |    |
| 48     |         | 1.61     | 1.32     | 0.22            | 0.03            | 0.25            | 0.34  | -     | 278                | 2   | 10                 | 58  | 190                | 32  |    |
| 49     |         | 1.58     | 1.17     | 0.25            | 0.05            | 0.2             | 0.33  | -     | 283                | 7   | 184                | 47  | 18                 | 39  |    |
| 82     |         | 1.64     | 1.12     | 0.29            | 0.09            | 0.2             | 0.37  | -     | 291                | 17  | 182                | 47  | 32                 | 29  |    |
| 83     |         | 1.13     | 1.25     | 0.11            | 0.11            | 0.12            | 0.18  | -     | 5                  | 65  | 273                | 1   | 182                | 30  |    |
| 84     |         | 1.63     | 1.2      | 0.26            | 0.04            | 0.22            | 0.35  | -     | 311                | 18  | 203                | 44  | 51                 | 31  |    |
| 999    |         | 1.53     | 1.17     | 0.23            | 0.04            | 0.19            | 0.3   | -     | 278                | 20  | 181                | 19  | 53                 | 63  |    |
| 32     |         | D. east  | 1.7      | 1.21            | 0.29            | 0.05            | 0.24  | 0.38  | -                  | 102 | 0                  | 10  | 50                 | 190 | 40 |
| 35     |         |          | 1.57     | 1.05            | 0.28            | 0.12            | 0.17  | 0.35  | -                  | 295 | 9                  | 122 | 78                 | 25  | 21 |
| 36     | 1.75    |          | 1.14     | 0.33            | 0.1             | 0.23            | 0.41  | -     | 93                 | 3   | 0                  | 30  | 180                | 60  |    |
| 37     | 1.58    |          | 1.21     | 0.24            | 0.03            | 0.22            | 0.32  | -     | 284                | 3   | 194                | 9   | 22                 | 71  |    |
| 39     | 1.32    |          | 1.07     | 0.16            | 0.05            | 0.12            | 0.2   | -     | 283                | 5   | 192                | 15  | 152                | 85  |    |
| 40     | 1.51    |          | 1.17     | 0.22            | 0.03            | 0.19            | 0.29  | -     | 276                | 0   | 178                | 30  | 4                  | 49  |    |
| 41     | 1.47    |          | 1.38     | 0.15            | 0.09            | 0.24            | 0.29  | -     | 98                 | 1   | 5                  | 80  | 188                | 22  |    |
| 42     | 1.52    |          | 1.14     | 0.24            | 0.05            | 0.18            | 0.3   | -     | 277                | 1   | 187                | 12  | 12                 | 75  |    |
| 67     | D. west | 1.81     | 1.13     | 0.35            | 0.12            | 0.24            | 0.44  | -     | 302                | 1   | 60                 | 88  | 212                | 5   |    |
| 70     |         | 1.53     | 1.1      | 0.25            | 0.08            | 0.17            | 0.32  | -     | 275                | 16  | 184                | 1   | 58                 | 68  |    |
| 71     |         | 1.62     | 1.03     | 0.31            | 0.14            | 0.17            | 0.38  | -     | 276                | 4   | 185                | 13  | 15                 | 57  |    |
| 72     |         | 1.71     | 1.1      | 0.33            | 0.12            | 0.21            | 0.4   | -     | 291                | 14  | 197                | 17  | 98                 | 74  |    |
| 75     |         | 1.69     | 1.1      | 0.32            | 0.11            | 0.21            | 0.4   | -     | 297                | 7   | 206                | 8   | 151                | 80  |    |
| 76     |         | 1.61     | 1.35     | 0.22            | 0.04            | 0.26            | 0.34  | -     | 282                | 3   | 19                 | 64  | 190                | 20  |    |
| 77     |         | 1.75     | 1.34     | 0.28            | 0.01            | 0.28            | 0.4   | -     | 302                | 16  | 45                 | 40  | 196                | 42  |    |
| 78     |         | 1.76     | 1.08     | 0.35            | 0.14            | 0.21            | 0.43  | -     | 304                | 14  | 213                | 7   | 73                 | 69  |    |
| 79     |         | 1.84     | 1.34     | 0.31            | 0.01            | 0.3             | 0.43  | -     | 287                | 11  | 194                | 14  | 43                 | 66  |    |

| Sample | Domain | $R_{xy}$ | $R_{xz}$ | $\varepsilon_x$ | $\varepsilon_y$ | $\varepsilon_z$ | $E_d$ | $v$  | X-axis<br>orientation | Y-axis<br>orientation | Z-axis<br>orientation |     |     |    |
|--------|--------|----------|----------|-----------------|-----------------|-----------------|-------|------|-----------------------|-----------------------|-----------------------|-----|-----|----|
| 14     | E      | 2.06     | 1.37     | 0.38            | -               | -               | 0.51  | -    | 113                   | 4                     | 9                     | 63  | 189 | 27 |
|        |        |          |          |                 | 0.03            | 0.35            |       |      | 0.13                  |                       |                       |     |     |    |
| 18     |        | 1.89     | 1.56     | 0.28            | 0.08            | -               | 0.46  | 0.4  | 133                   | 1                     | 31                    | 84  | 223 | 5  |
|        |        |          |          |                 |                 | 0.36            |       |      |                       |                       |                       |     |     |    |
| 20     |        | 1.69     | 1.37     | 0.24            | 0.03            | -               | 0.37  | 0.2  | 285                   | 1                     | 17                    | 57  | 195 | 23 |
|        |        |          |          |                 |                 | 0.28            |       |      |                       |                       |                       |     |     |    |
| 22     |        | 1.71     | 1.3      | 0.27            | 0               | -               | 0.38  | -    | 277                   | 1                     | 9                     | 66  | 189 | 24 |
|        |        |          |          |                 |                 | 0.27            |       |      | 0.02                  |                       |                       |     |     |    |
| 66     |        | 2.03     | 1.39     | 0.36            | -               | -               | 0.5   | -    | 98                    | 0                     | 10                    | 76  | 190 | 14 |
|        |        |          |          |                 | 0.02            | 0.35            |       |      | 0.07                  |                       |                       |     |     |    |
| 979    |        | 2.03     | 1.29     | 0.39            | -               | -               | 0.51  | -    | 309                   | 4                     | 55                    | 78  | 217 | 12 |
|        |        |          |          |                 | 0.07            | 0.32            |       |      | 0.28                  |                       |                       |     |     |    |
| 982    |        | 1.98     | 1.46     | 0.33            | 0.02            | -               | 0.48  | 0.11 | 284                   | 13                    | 48                    | 67  | 190 | 17 |
|        |        |          |          |                 | 0.35            |                 |       |      |                       |                       |                       |     |     |    |
| 984    | 1.72   | 1.35     | 0.26     | 0.02            | -               | 0.38            | 0.11  | 278  | 13                    | 142                   | 71                    | 4   | 3   |    |
|        |        |          |          |                 | 0.28            |                 |       |      |                       |                       |                       |     |     |    |
| 986    | 2.01   | 1.16     | 0.42     | -               | -               | 0.52            | -     | 298  | 0                     | 206                   | 82                    | 28  | 2   |    |
|        |        |          |          | 0.13            | 0.28            |                 |       | 0.57 |                       |                       |                       |     |     |    |
| 992    | 2.05   | 1.22     | 0.41     | -               | -               | 0.52            | -     | 261  | 9                     | 166                   | 26                    | 359 | 42  |    |
|        |        |          |          | 0.11            | 0.31            |                 |       | 0.45 |                       |                       |                       |     |     |    |
| 994    | 1.82   | 1.41     | 0.28     | 0.03            | -               | 0.42            | 0.15  | 112  | 2                     | 17                    | 61                    | 203 | 26  |    |
|        |        |          |          |                 | 0.31            |                 |       |      |                       |                       |                       |     |     |    |

Note: Domain's number corresponds to that in Figs. 3, 4.  $R_{xy}$ ,  $R_{xz}$  – axial ratios on planes normal to cleavage ( $xy$  – parallel,  $xz$  – normal to mineral lineation).  $\varepsilon_x$ ,  $\varepsilon_y$ ,  $\varepsilon_z$  – maximum, intermediate and minimum natural strains  $E_d$  – natural deviatoric strain, see Fig. 4,  $v$  – Lode's parameter value, see Fig. 3.  $X$ ,  $Y$ ,  $Z$  are long, intermediate and short axes of the strain ellipsoid, respectively. Orientation is trend and plunge of related axis.
